# Supplementary material for: IGF1R deficiency attenuates acute inflammatory response in a bleomycin-induced lung injury mouse model
Source: PubMed Central journal article supplement (PMC5487362; doi:10.1038/s41598-017-04561-4), 2017-06-27
Supplement: 41598_2017_4561_MOESM1_ESM.pdf [file 41598_2017_4561_MOESM1_ESM.pdf]

## Supplementary Information for

### ***Igflr* deficiency attenuates acute inflammatory response in a bleomycin-induced lung injury mouse model**

Sergio Piñeiro-Hermida<sup>1</sup>, Iciar P. López<sup>1</sup>, Elvira Alfaro-Arnedo<sup>1</sup>, Raquel Torrens<sup>1</sup>, María Iñiguez<sup>2</sup>, Lydia Alvarez-Erviti<sup>3</sup>, Carlos Ruíz-Martínez<sup>4</sup>, and José G. Pichel<sup>1,\*</sup>

<sup>1</sup> Lung Cancer and Respiratory Diseases Unit, <sup>2</sup> Genomics Core Facility and <sup>3</sup> Molecular Neurobiology Unit; Centro de Investigación Biomédica de la Rioja (CIBIR), Fundación Rioja Salud. <sup>4</sup> Pneumology Service, Hospital San Pedro. Logroño, Spain.

#### **Files included:**

**Supplementary Table S1.** Differential gene expression determined by RNAseq in the lung of *UBC-CreERT2; Igflr<sup>fl/fl</sup>* mutant mice (FDR < 0.2).

**Supplementary Table S2.** Biological functions and differentially expressed genes found with significant changes after RNAseq in the lung of *UBC-CreERT2; Igflr<sup>fl/fl</sup>* mutant mice (FDR < 0.1).

**Supplementary Table S3.** Differential BALF cell counts represented as the percentage of each cell type to total cell counts in *Igflr<sup>fl/fl</sup>* and *UBC-CreERT2; Igflr<sup>fl/fl</sup>* mice.

**Supplementary Table S4.** Primer sets used for qRT-PCR .

**Supplementary Table S1.** Differential gene expression determined by RNAseq in the lung of *UBC-CreERT2; Igf1<sup>fl/fl</sup>* mutant mice (FDR < 0.2)

| Position                                    | Gene name     | Description                                                                                       | Log2 fold change | Q-value/FDR |
|---------------------------------------------|---------------|---------------------------------------------------------------------------------------------------|------------------|-------------|
| 1                                           | Gpx8          | Glutathione peroxidase 8                                                                          | 33.33            | 5.08097E-11 |
| 2                                           | Igf1r         | Insulin-like growth factor 1 receptor                                                             | -2,35512         | 6.91951E-11 |
| 3                                           | Cyp11a1       | Cytochrome P450, family 1, subfamily a, polypeptide 1                                             | 2,22399          | 1.51895E-10 |
| 4                                           | Gnptg         | N-acetylglucosamine-1-phosphotransferase, gamma subunit                                           | 33.33            | 1.10271E-08 |
| 5                                           | Srrm2         | Serine/arginine repetitive matrix 2                                                               | -1,29438         | 2.90396E-06 |
| 6                                           | Nrlr2         | Nuclear receptor subfamily 1, group D, member 2                                                   | -1,43483         | 2.65234E-05 |
| 7                                           | Ppp1r2-ps4    | Protein phosphatase 1, regulatory (inhibitor) subunit 2, pseudogene 4                             | 33.33            | 3.69653E-05 |
| 8                                           | Saa3          | Serum amyloid A 3                                                                                 | 2,58211          | 7.26024E-05 |
| 9                                           | Epas1         | Endothelial PAS domain protein 1                                                                  | -1,17128         | 8.78217E-05 |
| 10                                          | Spon2         | Spondin 2, extracellular matrix protein                                                           | 1,76138          | 0.000320111 |
| 11                                          | Sloc2a1       | Solute carrier organic anion transporter family, member 2a1                                       | -1,08642         | 0.000596572 |
| 12                                          | Mll2          | Lysine (K)-specific methyltransferase 2D                                                          | -1,11086         | 0.000614606 |
| 13                                          | Npnt          | Nephronectin                                                                                      | -0,950843        | 0.000614606 |
| 14                                          | Hydin         | HYDIN, axonemal central pair apparatus protein                                                    | -1,51408         | 0.00123442  |
| 15                                          | Pcdh1         | Protocadherin 1                                                                                   | -0,92639         | 0.00123442  |
| 16                                          | Lyz1          | Lysozyme 1                                                                                        | 1,00162          | 0.00130818  |
| 17                                          | Top2a         | Topoisomerase (DNA) II alpha                                                                      | 1,19316          | 0.00146147  |
| 18                                          | Zbtb34        | Zinc finger and BTB domain containing 34                                                          | -33,33           | 0.00169479  |
| 19                                          | Cyyr1         | Cysteine and tyrosine-rich protein 1                                                              | -0,864652        | 0.00169479  |
| 20                                          | mt-Nd5        | NADH dehydrogenase 5, mitochondrial                                                               | -0,946779        | 0.00436231  |
| 21                                          | Ces1g         | Carboxylesterase 1G                                                                               | 2,10737          | 0.00454152  |
| 22                                          | Pcnx          | Pecanex homolog (Drosophila)                                                                      | -0,989945        | 0.00483008  |
| 23                                          | Muc5b         | Mucin 5, subtype B, tracheobronchial                                                              | -1,04542         | 0.0068965   |
| 24                                          | Med13l        | Mediator complex subunit 13-like                                                                  | -1,05975         | 0.0072912   |
| 25                                          | Lox           | Lysyl oxidase                                                                                     | -0,893177        | 0.00758989  |
| 26                                          | Tenc1         | Tensin 2                                                                                          | -0,95569         | 0.0130699   |
| 27                                          | Dnahc6        | Dynein, axonemal, heavy chain 6                                                                   | -0,953513        | 0.0156303   |
| 28                                          | Hist1h1d      | Histone cluster 1, H1d                                                                            | 1,27832          | 0.0174382   |
| 29                                          | Atp2a3        | ATPase, Ca++ transporting, ubiquitous                                                             | -0,935091        | 0.0195047   |
| 30                                          | Zbtb16        | Zinc finger and BTB domain containing 16                                                          | -0,87579         | 0.0255043   |
| 31                                          | Svep1         | Sushi, von Willebrand factor type A, EGF and pentraxin domain containing 1                        | -0,82965         | 0.0288283   |
| 32                                          | Mki67         | Antigen identified by monoclonal antibody Ki 67                                                   | 0,88978          | 0.0288283   |
| 33                                          | Snhg11        | Small nucleolar RNA host gene 11                                                                  | -1,27045         | 0.0331612   |
| 34                                          | Hist1h2bb     | Histone cluster 1, H2bb                                                                           | 1,21471          | 0.0347587   |
| 35                                          | Zfp518b       | Zinc finger protein 518b                                                                          | -33,33           | 0.0360491   |
| 36                                          | Zfx3          | Zinc finger homeobox 3                                                                            | -0,987494        | 0.0371726   |
| 37                                          | Notch3        | Neurogenic locus homolog protein 3                                                                | -1,01305         | 0.0405676   |
| 38                                          | Foxo1         | Forkhead box O1                                                                                   | -1,02458         | 0.0411093   |
| 39                                          | Apol11b       | Apolipoprotein L 11b                                                                              | -1,89341         | 0.0485738   |
| 40                                          | Syngap1       | Synaptic Ras GTPase activating protein 1 homolog (rat)                                            | -33,33           | 0.0487062   |
| 41                                          | AC147987.1    | RIKEN cDNA 4933404O12 gene                                                                        | 33.33            | 0.0492756   |
| 42                                          | C030017K20Rik | RIKEN cDNA C030017K20 gene                                                                        | -33,33           | 0.0507919   |
| 43                                          | Rab6b         | RAB6B, member RAS oncogene family                                                                 | -1,17859         | 0.0507919   |
| 44                                          | Crebbp        | CREB binding protein                                                                              | -0,854579        | 0.0508175   |
| 45                                          | Kif11         | Kinesin family member 11                                                                          | 1,18653          | 0.0508175   |
| 46                                          | Fancf         | Fanconi anemia, complementation group F                                                           | 33.33            | 0.0536387   |
| 47                                          | Hr            | Hairless                                                                                          | -33,33           | 0.0546633   |
| 48                                          | Ptpnb         | Protein tyrosine phosphatase, receptor type, B                                                    | -0,815991        | 0.0550762   |
| 49                                          | Gdgd3         | Glycerophosphodiester phosphodiesterase domain containing 3                                       | -1,6275          | 0.0593667   |
| 50                                          | Marco         | Macrophage receptor with collagenous structure                                                    | 1,43551          | 0.0632713   |
| 51                                          | Tet3          | Tet methylcytosine dioxygenase 3                                                                  | -0,969638        | 0.065462    |
| 52                                          | mt-Cytb       | Cytochrome b, mitochondrial                                                                       | -0,768723        | 0.0674572   |
| 53                                          | Luc7l2        | LUC7-like 2 (S. cerevisiae)                                                                       | -0,472481        | 0.0674572   |
| 54                                          | Nav2          | Neuron navigator 2                                                                                | -0,969168        | 0.0684272   |
| 55                                          | Ppp1r3c       | Protein phosphatase 1, regulatory (inhibitor) subunit 3C                                          | 1,13441          | 0.0712999   |
| 56                                          | Trim25        | Tripartite motif-containing 25                                                                    | -1,04788         | 0.0733889   |
| 57                                          | Prrc2c        | Proline-rich coiled-coil 2C                                                                       | -0,785804        | 0.0733889   |
| 58                                          | Mlxip         | MLX interacting protein                                                                           | -0,877622        | 0.076686    |
| 59                                          | Polr2a        | Polymerase (RNA) II (DNA directed) polypeptide A                                                  | -0,816322        | 0.0776129   |
| 60                                          | Ep300         | E1A binding protein p300                                                                          | -0,79195         | 0.0777767   |
| 61                                          | Abi3bp        | ABI gene family, member 3 (NESH) binding protein                                                  | -0,842908        | 0.0783232   |
| 62                                          | Tgfr3         | Transforming growth factor, beta receptor III                                                     | -0,794265        | 0.0902875   |
| 63                                          | Efnb2         | Ephrin B2                                                                                         | -0,983599        | 0.0926999   |
| 64                                          | Hnrmpu2       | Heterogeneous nuclear ribonucleoprotein U-like 2                                                  | -0,81716         | 0.0936172   |
| 65                                          | Rps7          | Ribosomal protein S7                                                                              | 1,53422          | 0.093661    |
| <b>Genes with FDR between 0.10 and 0.20</b> |               |                                                                                                   |                  |             |
| 66                                          | Cd5l          | CD5 antigen-like                                                                                  | 2,38007          | 0.11316     |
| 67                                          | Hist1h4m      | Histone cluster 1, H4m                                                                            | 33.33            | 0.114229    |
| 68                                          | Pdzd2         | PDZ domain containing 2                                                                           | -0,725257        | 0.115581    |
| 69                                          | Btbd3         | BTB (POZ) domain containing 3                                                                     | -0,70643         | 0.119155    |
| 70                                          | Sorbs3        | Sorbin and SH3 domain containing 3                                                                | -0,908928        | 0.120407    |
| 71                                          | Myo1d         | Myosin ID                                                                                         | -0,711134        | 0.120505    |
| 72                                          | Tubd1         | Tubulin, delta 1                                                                                  | 33.33            | 0.124497    |
| 73                                          | Ska1          | Spindle and kinetochore associated complex subunit 1                                              | 33.33            | 0.124497    |
| 74                                          | Fam65a        | Family with sequence similarity 65, member A                                                      | -1,0518          | 0.124918    |
| 75                                          | Dnahc1        | Dynein, axonemal, heavy chain 1                                                                   | -1,39517         | 0.127394    |
| 76                                          | mt-Nd6        | NADH dehydrogenase 6, mitochondrial                                                               | -0,805532        | 0.127994    |
| 77                                          | Pom121        | Nuclear pore membrane protein 121                                                                 | 33.33            | 0.127994    |
| 78                                          | Bmpr2         | Bone morphogenetic protein receptor, type II (serine/threonine kinase)                            | -0,708527        | 0.129371    |
| 79                                          | Hist1h1a      | Histone cluster 1, H1a                                                                            | 1,21029          | 0.129371    |
| 80                                          | Ptpng         | Protein tyrosine phosphatase, receptor type, G                                                    | -0,688689        | 0.129504    |
| 81                                          | Eif2c2        | Argonaute RISC catalytic subunit 2                                                                | -0,799781        | 0.134313    |
| 82                                          | Arhgap31      | Rho GTPase activating protein 31                                                                  | -0,642048        | 0.134313    |
| 83                                          | Igfbp3        | Insulin-like growth factor binding protein 3                                                      | 0,800809         | 0.158183    |
| 84                                          | D730039F16Rik | CutA divalent cation tolerance homolog-like                                                       | 33.33            | 0.163078    |
| 85                                          | Pkd1          | Polycystic kidney disease 1 homolog                                                               | -0,696951        | 0.16421     |
| 86                                          | Baz2a         | Bromodomain adjacent to zinc finger domain, 2A                                                    | -0,812446        | 0.168588    |
| 87                                          | Atp5k         | ATP synthase, H+ transporting, mitochondrial F1F0 complex, subunit E                              | 1,02612          | 0.169495    |
| 88                                          | Cd276         | CD276 antigen                                                                                     | 33.33            | 0.172103    |
| 89                                          | Gm10277       | Predicted gene 10277                                                                              | -33,33           | 0.174175    |
| 90                                          | Dock6         | Dedicator of cytokinesis 6                                                                        | -0,848506        | 0.175012    |
| 91                                          | Parp4         | Poly (ADP-ribose) polymerase family, member 4                                                     | -0,838119        | 0.175012    |
| 92                                          | Ptxna2        | Plexin A2                                                                                         | -0,703027        | 0.175012    |
| 93                                          | Sdf2l1        | Stromal cell-derived factor 2-like 1                                                              | 1,20602          | 0.178254    |
| 94                                          | Nsun5         | NOL1/NOP2/Sun domain family, member 5                                                             | 33.33            | 0.178254    |
| 95                                          | Crtc3         | CREB regulated transcription coactivator 3                                                        | -1,0953          | 0.182596    |
| 96                                          | Sh3pxd2a      | SH3 and PX domains 2A                                                                             | -0,669411        | 0.182596    |
| 97                                          | Arid1a        | AT rich interactive domain 1A (SWI-like)                                                          | -0,819629        | 0.182803    |
| 98                                          | Crim1         | Cysteine rich transmembrane BMP regulator 1 (chordin like)                                        | -0,714825        | 0.185107    |
| 99                                          | Smarca1       | SWI/SNF related, matrix associated, actin dependent regulator of chromatin, subfamily a, member 1 | 33.33            | 0.18851     |
| 100                                         | 2900026A02Rik | RIKEN cDNA 2900026A02 gene                                                                        | -1,04303         | 0.191335    |
| 101                                         | Fmn12         | Formin-like 2                                                                                     | -0,82042         | 0.191335    |
| 102                                         | Shank2        | SH3/ankyrin domain gene 2                                                                         | -1,65139         | 0.193573    |
| 103                                         | Pabpc1        | Poly(A) binding protein, cytoplasmic 1                                                            | -0,800107        | 0.193573    |
| 104                                         | mt-Nd4        | NADH dehydrogenase 4, mitochondrial                                                               | -0,676625        | 0.197356    |
| 105                                         | Brd4          | Bromodomain containing 4                                                                          | -0,965817        | 0.198125    |
| 106                                         | Hspg2         | Perlecan (heparan sulfate proteoglycan 2)                                                         | -0,768995        | 0.198125    |
| 107                                         | Reck          | Reversion-inducing-cysteine-rich protein with kazal motifs                                        | -0,854115        | 0.198715    |

**Supplementary Table S2.** Biological functions and differentially expressed genes found with significant changes after RNAseq in the lung of *UBC-CreERT2; Igf1r<sup>fl/fl</sup>* mutant mice (FDR < 0.1).

| Biological functions                          | Up-regulated genes                              | Down-regulated genes                                                                                                                                    |
|-----------------------------------------------|-------------------------------------------------|---------------------------------------------------------------------------------------------------------------------------------------------------------|
| <i>Development and growth</i>                 | <i>Saa3, Mki67, Kif11, Fancf, Ppp1r3c, Rps7</i> | <i>Epas1, Npnt, Pcdh1, Lox, Tenc1, Zbtb16, Zfhx3, Notch3, Foxo1, Apol11b, Syngap1, Crebbp, Prprb, Luc7l2, Nav2, Prrc2c, Ep300, Abi3bp, Tgfr3, Efnb2</i> |
| <i>Transcriptional regulation</i>             | <i>Hist1h1d, Hist1h2bb, Ppp1r3c, Rps7</i>       | <i>Srrm2, Nr1d2, Epas1, Zbtb34, Med13l, Zbtb16, Zfp518b, Zfhx3, Notch3, Foxo1, Crebbp, Hr, Tet3, Luc7l2, Mxip, Polr2a, Ep300, Hnrnpul2</i>              |
| <i>Epigenetics</i>                            | <i>Top2a, Hist1h1d, Hist1h2bb, Fancf</i>        | <i>Mll2, Foxo1, Rab6b, Crebbp, Tet3, Polr2a, Ep300</i>                                                                                                  |
| <i>Inflammation and Immune response</i>       | <i>Saa3, Spon2, Lyz1, Marco</i>                 | <i>Nr1d2, Slco2a1, Muc5b, Foxo1, Trim25, Tgfr3</i>                                                                                                      |
| <i>Protumoral activity</i>                    | <i>Tp2a, Mki67</i>                              | <i>Epas1, Mll2, Atp2a3, Notch3, Trim25, Prrc2c, Abi3bp, Efnb2</i>                                                                                       |
| <i>Hypoxia, redox and oxidative stress</i>    | <i>Gpx8, Cyp1a1</i>                             | <i>Nr1d2, Epas1, mt-Nd5, Foxo1, Hr, mt-Cytb, Ep300, Tgfr3</i>                                                                                           |
| <i>Cell adhesion and migration</i>            | <i>Spon2</i>                                    | <i>Npnt, Pcdh1, Tenc1, Svep1, Nav2, Tgfr3, Efnb2</i>                                                                                                    |
| <i>Tumor suppression</i>                      | -                                               | <i>Zbtb16, Lox, Zfhx3, Notch3, Foxo1, Ep300, Tgfr3</i>                                                                                                  |
| <i>Respiratory diseases</i>                   | <i>Saa3, Marco</i>                              | <i>Epas1, Pcdh1, Muc5b, Notch3</i>                                                                                                                      |
| <i>Vascular permeability and Hypertension</i> | <i>Spon2</i>                                    | <i>Epas1, Lox, Foxo1, Ptprb</i>                                                                                                                         |
| <i>Insulin regulation and resistance</i>      | <i>Saa3</i>                                     | <i>Epas1, Mll2, Atp2a3, Foxo1</i>                                                                                                                       |
| <i>Metabolism</i>                             | <i>Ces1g, Ppp1r3c</i>                           | <i>Nr1d2, Foxo1, Gdpd3</i>                                                                                                                              |
| <i>Regulated by Igf action and signalling</i> | -                                               | <i>Muc5b, Lox, Foxo1, Crebbp, Efnb2</i>                                                                                                                 |
| <i>Detoxification and damage resistance</i>   | <i>Cyp1a1, Spon2, Ces1g</i>                     | <i>Epas1, Notch3</i>                                                                                                                                    |
| <i>Cell transport</i>                         | -                                               | <i>Atp2a3, Apol11b, Rab6b</i>                                                                                                                           |
| <i>Ciliary motility</i>                       | <i>Kif11</i>                                    | <i>Hydin, Dnahc6</i>                                                                                                                                    |
| <i>Other/Unknown</i>                          | <i>Gnptg, Ppp1r2-ps4, Ac147987.1</i>            | <i>Cyyr1, Pcnx, Snhg11, C030017K20Rik, Syngap1</i>                                                                                                      |

**Supplementary Table S3.** Differential BALF cell counts represented as the percentage of each cell type to total cell counts in *Igf1r<sup>fl/fl</sup>* and *UBC-CreERT2; Igf1r<sup>fl/fl</sup>* mice.

| Cell type          | Condition | <i>Igf1r<sup>fl/fl</sup></i> | <i>CreERT2</i>     |
|--------------------|-----------|------------------------------|--------------------|
| <i>Neutrophils</i> | SAL       | 0.833 ± 0.166                | 0.833 ± 0.396      |
|                    | BLM       | 55.416 ± 1.535               | 17.250 ± 3.119 *** |
| <i>Macrophages</i> | SAL       | 97.583 ± 0.567               | 98.998 ± 0.192     |
|                    | BLM       | 37.166 ± 2.558               | 73.250 ± 2.495 *** |
| <i>Lymphocytes</i> | SAL       | 1.583 ± 0.416                | 0.999 ± 0.360      |
|                    | BLM       | 8.333 ± 0.990                | 9.500 ± 1.040      |

Data are expressed as mean ± SEM. \*\*\* p < 0.001, when comparing *Igf1r<sup>fl/fl</sup>* vs. *UBC-CreERT2; Igf1r<sup>fl/fl</sup>* on each condition. SAL, saline; BLM, bleomycin.

**Supplementary Table S4.** Primer sets used for qRT-PCR.

| <b>Gene</b>   | <b>Accession No.</b> | <b>Forward primer (5'-3')</b> | <b>Reverse primer (5'-3')</b> |
|---------------|----------------------|-------------------------------|-------------------------------|
| <i>Adgre1</i> | NM_010130.4          | ATACCCTCCAGCACATCCAG          | CTCCCATCCTCCACATCAGT          |
| <i>Aqp5</i>   | NM_009701            | GGTGGTCATGAATCGGTTTCAGC       | GTCCTCCTCTGGCTCATATGTG        |
| <i>Cd209a</i> | NM_133238.5          | GAGATGACGGCTGGAATGAC          | AGATGGTGGAGGGAGTTGG           |
| <i>Csf1</i>   | NM_007778.4          | CGAGTCAACAGAGCAACCAA          | TGCTTCCTGGGTCAAAAATC          |
| <i>Cxcl1</i>  | NM_008176.3          | ATCCAGAGCTTGAAGGTGTTG         | GTCTGTCTTCTTTCTCCGTTACTT      |
| <i>Foxo1</i>  | NM_019739.3          | TTCTCTCGTCCCAACATCT           | TGCTGTCCTGAAGTGTCTGC          |
| <i>Gpx8</i>   | NM_027127.2          | ACATTCCCACATCTCCACAA          | ATTCCACCTTGGCTCCTTCT          |
| <i>Hif1a</i>  | NM_010431.2          | TTGGAACGGTGGAAAAACTG          | ACTTGGAGGGCTTGAGAAAT          |
| <i>Igf1</i>   | NM_010512            | CAGAAGCGATGGGAAAAT            | GTGAAGGTGAGCAAGCAGAG          |
| <i>Igflr</i>  | NM_010513            | ATGGCTTCGTTATCCACGAC          | AATGGCGGATCTTCACGTAG          |
| <i>Igfbp3</i> | NM_008343.2          | GCCCTCTGCCTTCTTGATTT          | TCACTCGGTTATGGGTTTCC          |
| <i>Igfbp5</i> | NM_010518.2          | GATGAGACAGGAATCCGAACAAG       | AATCCT TTGCGGTCACAGTTG        |
| <i>Il1b</i>   | NM_008361.3          | GCAACTGTTCTGAATCAACT          | ATCTTTTGGGGTCCGTCAACT         |
| <i>Il6</i>    | NM_031168.1          | ACGGCCTTCCCTACTTCACA          | CATTCCACGATTTCCCAGA           |
| <i>Il13</i>   | NM_008355.3          | GCCTCCCGATACCAAAAT            | CTTCCTCCTCAACCTCCTC           |
| <i>Insr</i>   | NM_010568.2          | TCCTGAAGGAGCTGGAGGAGT         | CTTTCGGGATGGCCTGG             |
| <i>Ly6g</i>   | NM_001310438.1       | CCTGGTTTCAGTCCTTCTGC          | CACACACTACCCCAACTCA           |
| <i>Marco</i>  | NM_010766.2          | TCCCTGTGATGGAGACCTTC          | GTGAGCAGGATCAGGTGGAT          |
| <i>Rn18s</i>  | NR_003278.3          | ATGCTCTTAGCTGAGTGTCCTCG       | ATTCCTAGCTGCGGTATCCAGG        |
| <i>Sftpc</i>  | NM_011359            | GAAGATGGCTCCAGAGAGCATC        | GGACTCGGAACCAGTATCATGC        |
| <i>Tnf</i>    | NM_013693.3          | GCCTCTTCTCATTCTGCTTG          | CTGATGAGAGGGAGGCCATT          |
